# Supplementary material for: In vitro effect of direct current electrical stimulation on rat mesenchymal stem cells
Source: PeerJ. 2017 Jan 12;5:e2821. doi: 10.7717/peerj.2821 (PMC5237370; doi:10.7717/peerj.2821)
Supplement: Data S1 [file peerj-05-2821-s001.xlsx]

## Sheet: MSC vs ASC
	Day 7								Day 14
	MSC 100mV/mm				ASC 100mV/mm				MSC 100mV/mm				ASC 100mV/mm
	0.925317	0.986133	0.798267		0.731017	0.678133	0.373283		0.668538	0.603562	0.5645		0.416587	0.444575	0.448337
	MSC Control				ASC Control				MSC Control				ASC Control
	1.13217	1.07388	0.9349		0.4942	0.467433	0.362383		0.695188	0.687638	0.710087		0.385662	0.402413	0.38645
	0.817297	0.918287	0.853852		1.47919	1.45076	1.03008		0.961665	0.877734	0.794972		1.08019	1.10477	1.16014
	Day 7	Day 14
AT-MSC	1.32001	1.11503
BM-MSC	0.863146	0.878124
SD A	0.25149	0.0409541
AD B	0.0511323	0.083347

## Sheet: Relative
Day7								Day14
MSC Control				ASC Control				MSC Control				ASC Control
0.817297	0.918287	0.853852		1.47919	1.45076	1.33008		0.931665	0.877734	0.794972		1.08019	1.10477	1.16014
-0.182703	-0.0817128	-0.146148		0.479192	0.450759	0.330079		-0.068335	-0.122266	-0.205028		0.0801867	0.104774	0.160144
	Day 7	Day 14
AT-MSC	0.42001	0.115035
BM-MSC	-0.136854	-0.131876
SD A	0.0791697	0.0409541
AD B	0.0511323	0.0688511
